# Supplementary material for: Tracking and quantification of dendritic cell migration and antigen trafficking between the skin and lymph nodes
Source: PubMed Central journal article supplement — Sci Rep. 2014 Aug 12;4:6030. doi: 10.1038/srep06030 (PMC4129424; doi:10.1038/srep06030), 2014-08-12
Supplement: srep06030-s1.pdf [file srep06030-s1.pdf]

## **Supplementary Information for**

### **Tracking and quantification of dendritic cell migration and antigen trafficking between the skin and lymph nodes**

Michio Tomura, Akihiro Hata, Satoshi Matsuoka, Francis H.W. Shand, Yasutaka Nakanishi, Ryoyo Ikebuchi, Satoshi Ueha, Hidekazu Tsutsui, Kayo Inaba, Kouji Matsushima, Atsushi Miyawaki, Kenji Kabashima, Takeshi Watanabe, and Osami Kanagawa

**Supplementary Figure S1.** The gene targeting strategy used to generate ROSA26-CAG-loxP-stop-loxP-KikGR knock-in mice.

**Supplementary Figure S2.** Identification of skin-derived DC subsets in the lymph node (LN), epidermis and dermis by flow cytometry.

**Supplementary Figure S3.** Identification of skin-derived DC subsets in the dLN using Langerin-EGFP mice and flow cytometry.

**Supplementary Figure S4.** Identification of LCs in the LNs of KikGR chimeric mice by flow cytometry.

**Supplementary Figure S5.** Migration of KikGR-red skin-derived DCs to the auricular dLNs after photoconversion of the skin of the ears.

**Supplementary Figure S6.** Repeat photoconversion of the abdominal skin to determine the proportion of the photoconverted skin area that is drained by the dLN.

**Supplementary Figure S7.** Summary of the dynamics of skin-derived DC migration and antigen trafficking in the steady state, after chemical stress, and after mechanical injury.

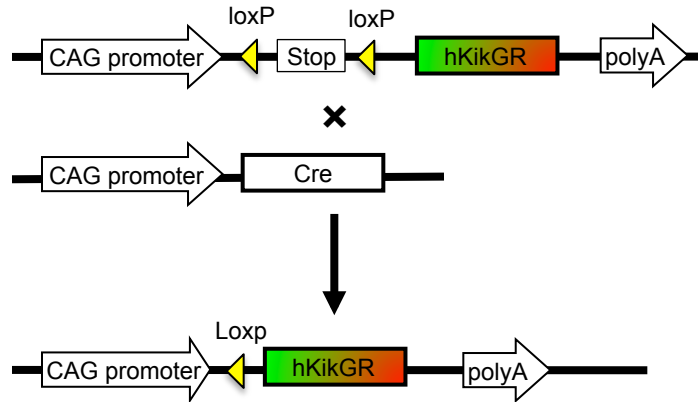

**Supplementary Figure S1.** The gene targeting strategy used to generate ROSA26-CAG-loxP-stop-loxP-KikGR knock-in mice. ROSA26-CAG-loxP-stop-loxP-KikGR knock-in mice were cross-mated with CAG-Cre mice to delete the loxP-stop-loxP site and achieve KikGR expression in all cells of the mice due to the ubiquitous expression of the CAG promoter.

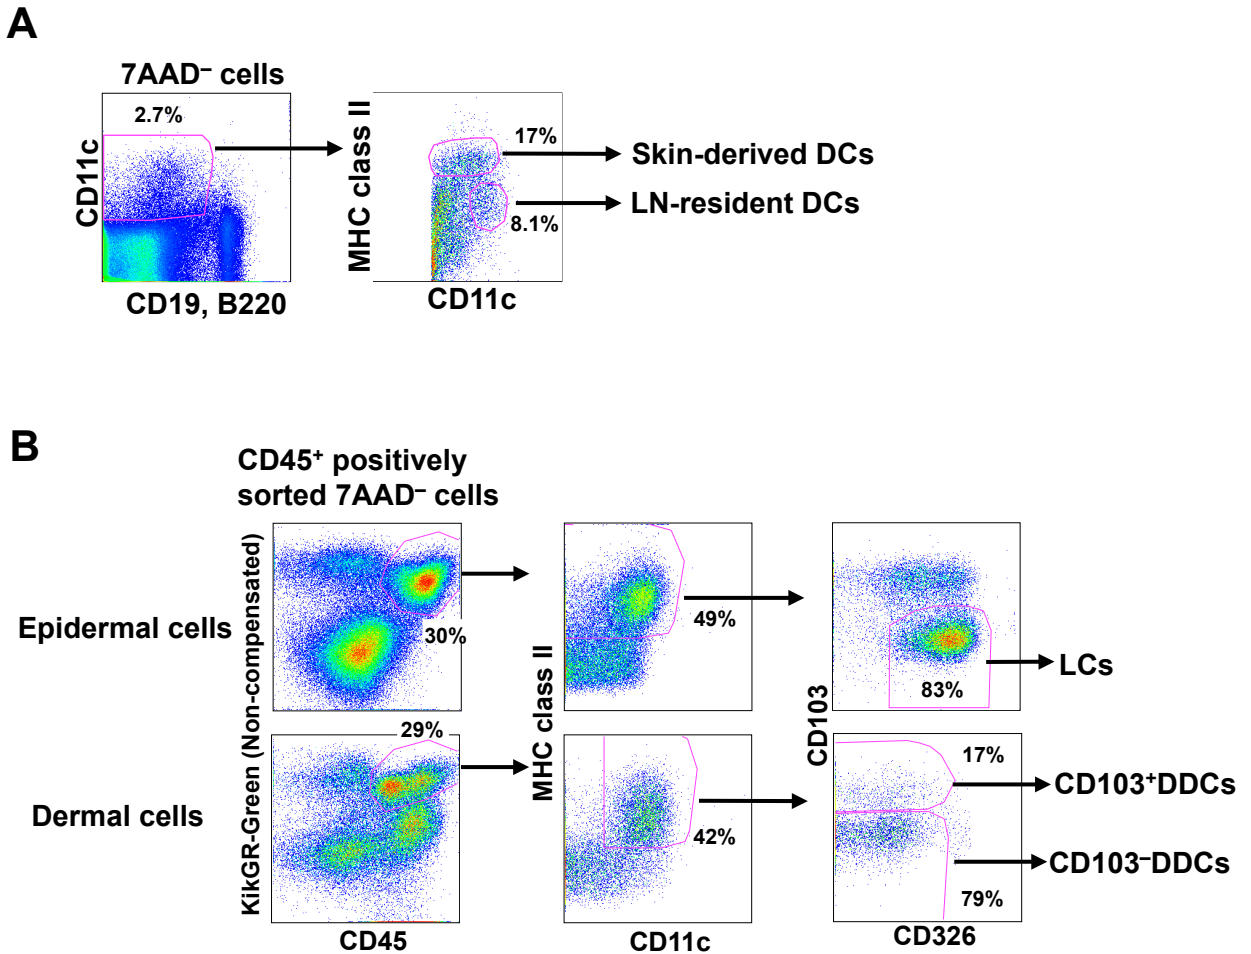

**Supplementary Figure S2.** Identification of skin-derived DC subsets in the lymph node (LN), epidermis and dermis by flow cytometry. **(A)** Gating scheme used to identify skin-derived DCs and LN-resident DCs in the dLN. Single-cell suspensions from the LNs of KikGR mice were incubated with an Fc-blocker (2.4G2), stained with a biotinylated anti-CD103 antibody followed by PE/Cy7-conjugated anti-CD19 and anti-B220 antibodies, APC-conjugated streptavidin, an APC/Cy7-conjugated anti-CD326 antibody, a Pacific Blue-conjugated anti-CD11c antibody, and a Pacific Orange-conjugated anti-MHC class II antibody, after which the cells were analyzed by flow cytometry. Dead cells were excluded based on 7-amino-actinomycin D (7AAD) staining. **(B)** Gating scheme used to identify LCs in the epidermis and CD103-DCs and CD103<sup>+</sup> DDCs in the dermis. Single-cell suspensions from the epidermis and dermis of KikGR mice were incubated with an Fc-blocker (2.4G2), then stained with anti-CD45 MACS beads for positive selection-based enrichment of CD45<sup>+</sup> cells using a MACS column. CD45<sup>+</sup> cells were then stained with a biotinylated anti-CD103 antibody followed by PE/Cy7-conjugated anti-CD45, APC-conjugated anti-MHC class II, APC/Cy7-conjugated anti-CD326, Brilliant Violet 421-conjugated anti-CD103, and Brilliant Violet 570-conjugated CD11c antibodies. Dead cells were excluded based on 7-amino-actinomycin D (7AAD) staining.

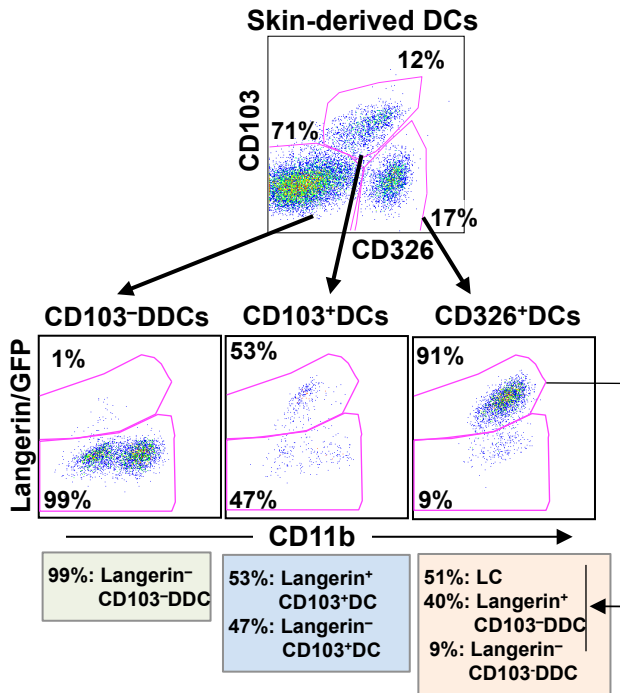

**Supplementary Figure S3.** Identification of skin-derived DC subsets in the dLN using Langerin-EGFP mice and flow cytometry. Single-cell suspensions from the cutaneous LNs of Langerin-EGFP mice were stained with fluorochrome-labeled anti-CD103, anti-CD11b, anti-CD326, anti-CD11c, anti-MHC class II, anti-CD19, and anti-B220 antibodies before analysis by flow cytometry. Dead cells were excluded based on 7-amino-actinomycin D (7AAD) staining. After gating as shown in **Supplementary Fig. S2A**, skin-derived DCs were gated into subpopulations based on their expression of CD103 and CD326. Lower plots show the expression of Langerin/GFP and CD11b within each subpopulation. Percentages on dot plots indicate the frequency of each subset. Data are representative of three independent experiments.

\*CD103<sup>-</sup>DDCs consisted almost entirely of Langerin<sup>-</sup>CD103<sup>-</sup>DDCs.

\*CD103<sup>+</sup>DCs consisted of 47% Langerin<sup>-</sup>CD103<sup>+</sup>DCs and 53% Langerin<sup>+</sup> CD103<sup>+</sup> DCs.

\*CD326<sup>+</sup>DCs consisted of 9% Langerin<sup>-</sup>CD103<sup>-</sup>DDCs and 91% Langerin<sup>+</sup> cells. The Langerin<sup>+</sup> cells could be further divided into 51% LCs and 40% (91% minus 51%) CD103<sup>-</sup>Langerin<sup>+</sup>DDCs, because CD326<sup>+</sup>DCs represented 51% of LCs (see **Supplementary Fig. S4**) and LCs express Langerin.

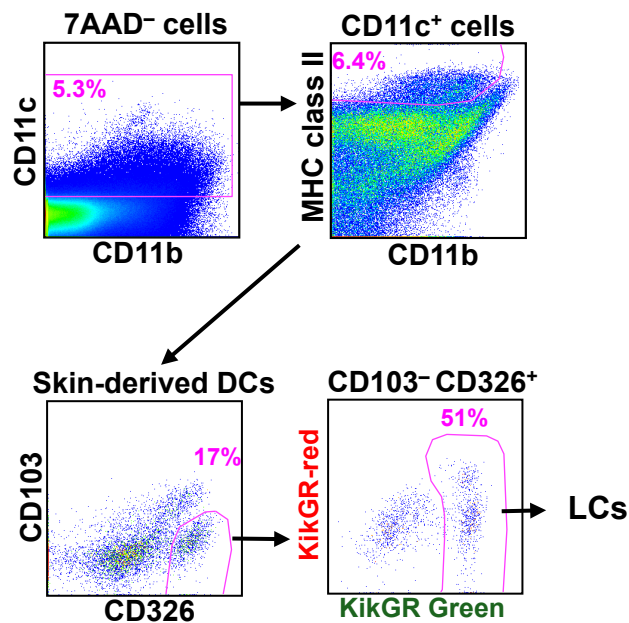

**Supplementary Figure S4.** Identification of LCs in the LNs of KikGR chimeric mice by flow cytometry. BM chimeras in which KikGR mice were reconstituted with BM cells from WT mice (WT BM→KikGR) were used to detect radioresistant LCs. Single-cell suspensions of LNs from WT-BM→KikGR chimeric mice were incubated with a Fc-blocker (2.4G2), stained with PE/Cy7-conjugated anti-CD11b, APC-conjugated anti-MHC class II, APC/Cy7-conjugated anti-CD326, Brilliant Violet 421-conjugated anti-CD103 and Brilliant Violet 570-conjugated CD11c antibodies, then analysed by flow cytometry. Dead cells were excluded based on 7-amino-actinomycin D (7AAD) staining. Within the CD103<sup>-</sup>CD326<sup>+</sup> subpopulation of CD11c<sup>+</sup>MHC class II<sup>high</sup> DCs, radioresistant LCs were identified as KikGR<sup>+</sup> cells.

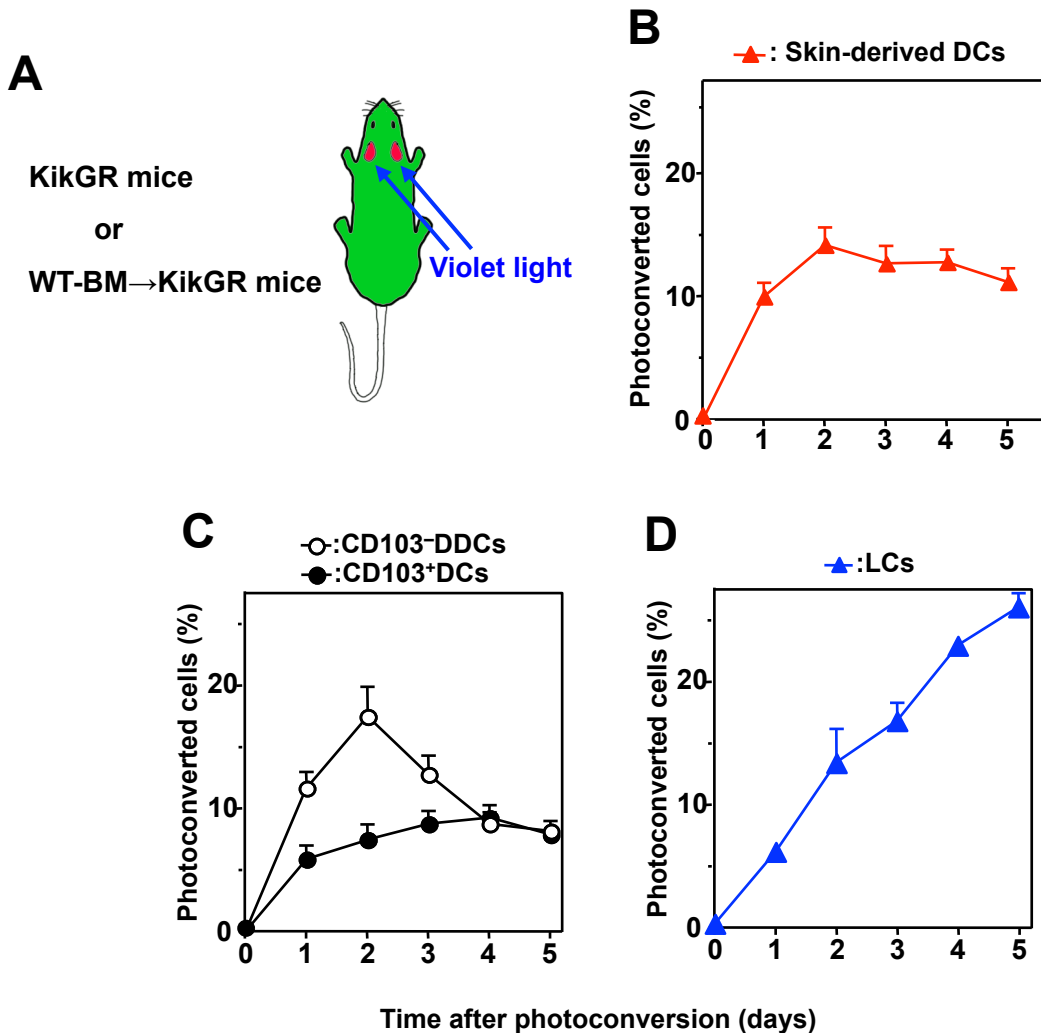

**Supplementary Figure S5.** Migration of KikGR-red skin-derived DCs in the auricular dLNs after photoconversion of the skin of the ears. **(A)** The ear skin of KikGR mice or WT-BM→KikGR chimeric mice was photoconverted by exposure to violet light (436 nm, 95 mW/cm<sup>2</sup>) for 2 min. **(B)** Following ear skin photoconversion, cells from the auricular dLNs were isolated and stained for analysis of skin-derived DCs by flow cytometry (see **Supplementary Fig. S2A** for gating strategy). **(C)** Total skin-derived DCs from the auricular dLN of KikGR mice after ear skin photoconversion (as in panel **B**) were further gated into CD103-DDCs and CD103<sup>+</sup>DCs (see **Supplementary Fig. S3** for gating strategy). **(D)** The ear skin of WT-BM→KikGR chimeric mice was photoconverted before analysis of LCs in the auricular dLN by flow cytometry (see **Supplementary Fig. S4** for gating strategy). Data (mean ± SE) represent the proportion of skin-derived DCs labeled KikGR-red. A minimum of six samples was analyzed at each time point. Data are representative of two independent experiments. Illustration created by M.T. using Adobe Photoshop software.

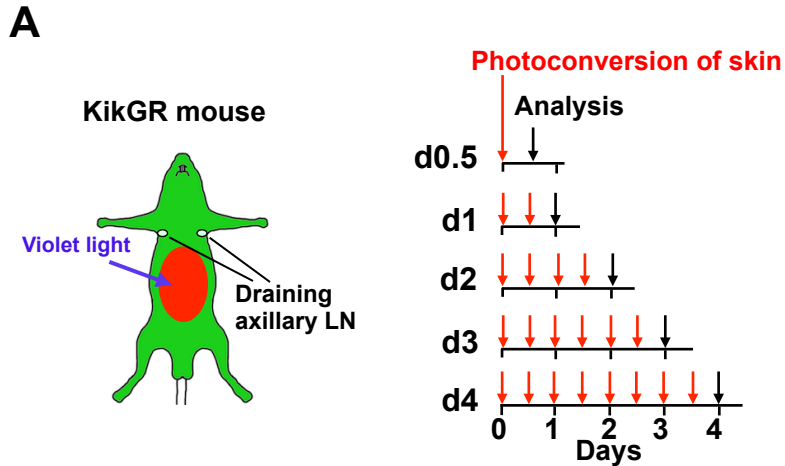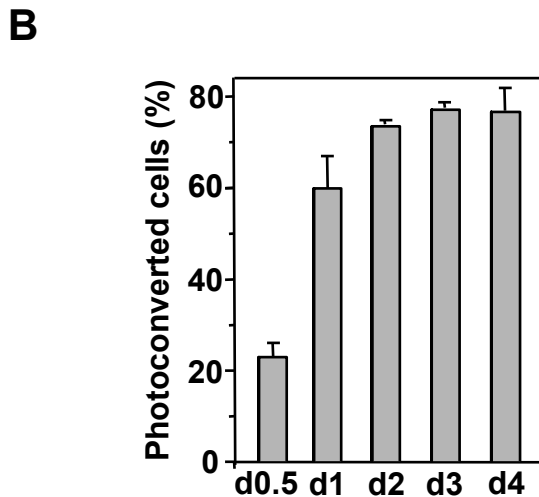

**Supplementary Figure S6.** Repeat photoconversion of the abdominal skin to determine the proportion of the photoconverted skin area that is drained by the dLN. **(A)** The clipped abdominal skin of KikGR mice was photoconverted every 12 h for 1, 2, 3, or 4 days in order to produce a continuous supply of KikGR-red DCs migrating to the dLN. **(B)** Cells from the dLNs were isolated at the time points indicated and stained for analysis of skin-derived DCs by flow cytometry (see **Supplementary Fig. S2A** for gating strategy). Data represent the proportion of skin-derived DCs labeled KikGR-red. The proportion of KikGR-red skin-derived DCs in the dLN plateaued at  $76\% \pm 5.2\%$  (mean  $\pm$  SE,  $n = 3$ ). These results suggest that under our protocol, the abdominal skin “photoconverted area” represented 76% of the skin draining to the axillary dLNs, which is the maximum possible proportion of KikGR-red skin-derived DCs in the dLN. The other 24% of skin-derived DCs in the dLN (KikGR-green) are derived from skin outside the abdominal photoconversion area. Illustration created by M.T. using Adobe Photoshop software.

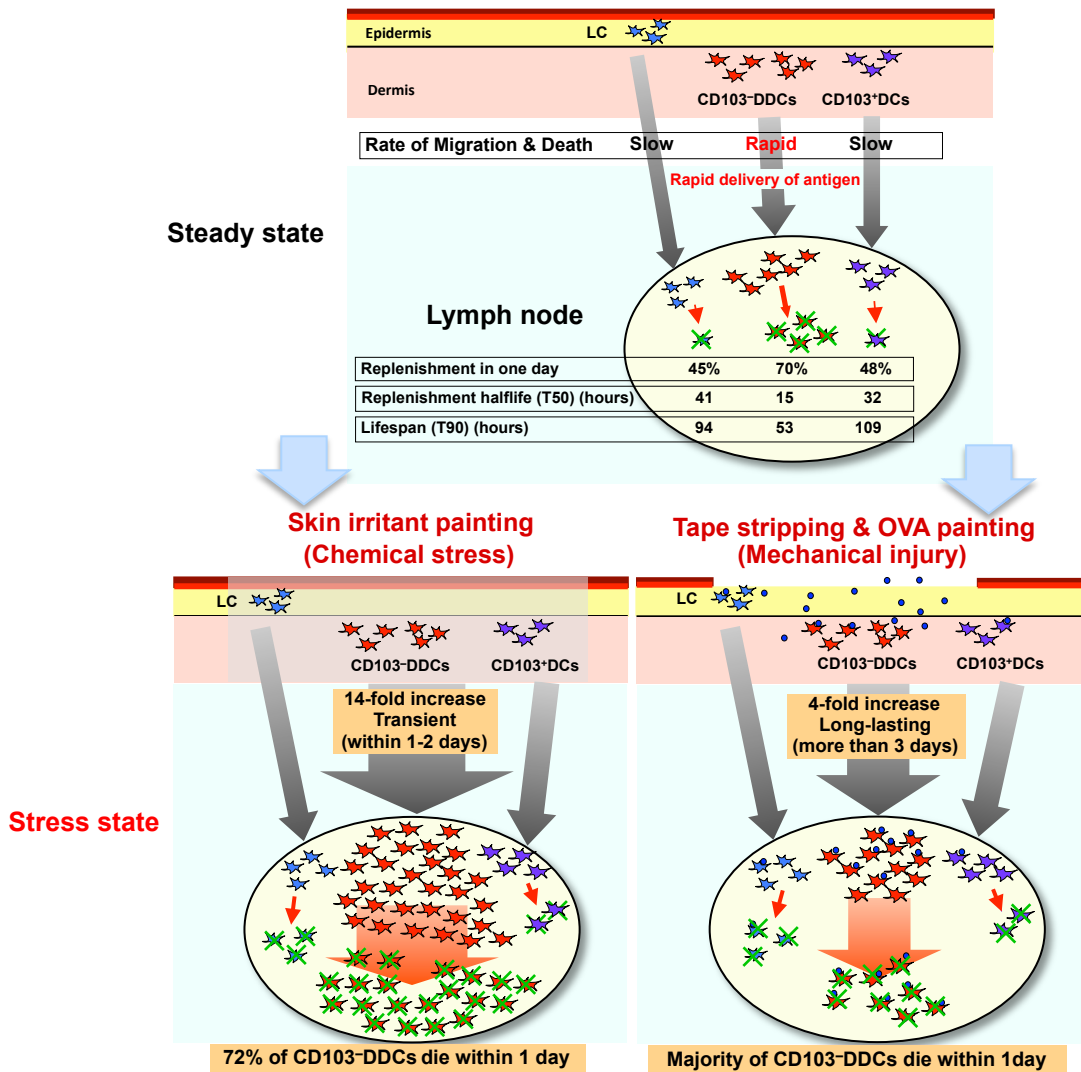

**Supplementary Figure S7.** Summary of the dynamics of skin-derived DC migration and antigen trafficking in the steady state, after chemical stress, and after mechanical injury. In the steady state, the relative migration rates of skin-derived DC subsets were: CD103-DDCs (Langerin<sup>-</sup>CD103-DDCs) > CD103<sup>+</sup>DCs (including Langerin<sup>+</sup>CD103<sup>+</sup>DDCs)  $\approx$  LCs. Migration rates correlated with daily replenishment rates and calculated lifespans (upper panel). Skin irritant painting induced a 14-fold increase in CD103-DDC migration from the skin to the dLN on day one, however, 72% of these cells were lost from the dLN within the next 24 h (bottom left). Tape stripping promoted the trafficking of exogenous proteins by CD103-DDCs and a 4-fold increase in the migration of these cells to the dLNs that lasted for more than three days; however, the majority of migrants were lost and replaced by new migrants within 24 h (bottom right).
